# Local field potential signal transmission is correlated with the anatomical connectivity measured by diffusion tractography

†<sup>1</sup>Maral Kasiri, †<sup>2</sup>Sumiko Abe, <sup>2</sup>Rahil Sorouhmojdehi, <sup>2</sup>Estefania Hernandez-Martin, <sup>2</sup>S. Alireza Seyyed Mousavi, and <sup>1,2,3</sup>Terence D. Sanger

<sup>1</sup> *Department of Biomedical Engineering, University of California, Irvine, CA, USA*

<sup>2</sup> *Department of Electrical Engineering and Computer Science, University of California, Irvine, CA, USA*

<sup>3</sup> *Department of Neurology, Children's Health Orange County, Orange, CA, USA*

† *Same contribution*

## Abstract

**Objective:** In this paper we aim to examine the correlation between diffusion tensor imaging (DTI) parameters of anatomical connectivity and characteristics of signal transmission obtained from patient-specific transfer function models. Here, we focused on elucidating the correlation between structural and functional neural connectivity within a cohort of patients diagnosed with dystonia.

**Methods:** DTI images were obtained from twelve patients with dystonia prior to the deep brain stimulation (DBS) surgery. For each patient we processed the imaging data to estimate anatomical measures including fractional anisotropy (FA), axial diffusivity (AD), number of fiber tracts per unit area (N), and fiber tract length (L). After the implantation of temporary depth leads for each patient as part of their treatment plan, intracranial signals were recorded. Transfer function models and the corresponding measures of functional connectivity were computed for each patient using local field potential (LFP) recordings. Generalized Linear Model (GLM) was then employed to determine the relationship between transfer function measures and DTI parameters.

**Results:** Our results illustrate a positive correlation between FA, AD, and intrinsic neural transmission measures obtained from the transfer functions models. However, no significant correlation was found between the functional connectivity (measures computed from the transfer functions gains) and number of fiber tracts or fiber lengths.

**Conclusion:** Our findings suggest that white matter integrity, as measured by FA and AD, can potentially reflect the amplification and spread of intrinsic brain signals throughout the network. This study underscores the significant

**NOTE: This preprint reports new research that has not been certified by peer review and should not be used to guide clinical practice.**

relationship between structural and functional connectivity, offering valuable insights into propagation of neural activity in the brain network and potential implications for optimizing treatments for neurological disorders.

## I. INTRODUCTION

Advancements in neuroimaging techniques have fundamentally changed our understanding of brain functional and anatomical connectivity [1], [2]. Diffusion Tensor Imaging (DTI), as an advanced MRI modality, enables us to visualize white matter tracts that connect cortical and subcortical structures by measuring the motion of water molecules and provide us with valuable insights into the structural connectivity of the brain. With its capacity to reveal complex details of brain micro-structure, DTI plays a significant role in optimizing procedures like deep brain stimulation (DBS) [3]–[18]. DBS procedure can be finely tuned by utilizing DTI to precisely map neural pathways and understand microstructural connections, promising improved treatment protocols and outcomes for patients suffering from neurological disorders [5].

Studying the relation between structural and functional connectivity is an important domain of research for understanding the brain as a complex network of interconnected regions [19]–[23]. Studies have explored the complex relationships and communication patterns between different brain areas in various neurological disorders. For example such analysis in epilepsy helps to map the seizure network by exploring the relationships between the structural and functional networks responsible for conduction of epileptic activity [22]. Moreover, such studies have been conducted on healthy subjects to find the correlation between DTI measures and resting state functional MRI (fMRI). fMRI has lower spatial resolution than electrophysiology data and it does not capture the deep brain activity, however it reflects the cortical functional connectivity. This study showed that functional connectivity reflects structural connectivity to a large degree, although there is not a definite one-to-one mapping [24]. Despite all the research endeavors that provide invaluable insights into the interaction between structural and functional connectivity, the relationship between the two for transmission of non-epileptic brain signals remains unclear.

Transfer functions have been widely used to study the signal transmission and physiological connectivity within brain regions [25], [26]. For example, Kamali et al. [26] utilized characteristics of patient specific transfer function models of pathways in order to localize the seizure onset zones. In our previous studies, we have shown that transfer function models of deep brain regions can be used to replicate the evoked

responses from DBS, informing us of existence of some relationship between the transmission of DBS pulses through neural pathways and the functional connectivity [27]. Moreover, we have shown that the DBS changes the transfer function gains of deep brain regions meaning that DBS pulses have some effects on the functional connectivity. Building upon these fundamental studies that use transfer function methods [26], we aim to compute measures of signal transmission using patient specific transfer function models and find their relationship with structural characteristics provided by DTI measures, including fractional anisotropy (FA), axial diffusivity (AD), fiber length (L), and number of fibers per unit area (N), in basal ganglia and thalamic subnuclei. We hypothesize that the measures of signal amplification and transmission computed from transfer functions are positively correlated with the FA and AD. In other words, we hypothesise that the white matter integrity of the fibers and the diffusivity of neural pathways are reflected in functional connectivity represented by the transfer function measures.

In order to do so, we recorded deep brain signals of deep brain regions in twelve patients with dystonia, who underwent DBS procedure as part of their clinical evaluation. MRI, CT and DTI images were acquired and the DTI anatomical measures were calculated. Transfer functions of each pathway for each individual were computed. We then compared the DTI measures and the transfer function measures by using generalized linear model (GLM) to test our hypothesis. Understanding the correlation and mapping between DTI parameters that can be calculated noninvasively and characteristics of transfer function models, which require invasive measurements from deep brain regions, offers invaluable insights into the relationship of brain structure and function and results in improvement of treatment protocols and outcomes.

## II. MATERIALS AND METHODS

### A. *Subjects*

twelve pediatric and young adults patients, diagnosed with primary or secondary dystonia by a movement disorder specialist (T.D.S), underwent a staged implantation of DBS leads a [28], [29]. The patients or the guardians of minors provided Health Insurance Portability and Accountability Act (HIPAA) authorization for research use of electrophysiological data before the procedure and provided written informed consent for surgical procedures conforming to standard hospital practice at Children's Health Orange County (CHOC) or Children's Hospital Los Angeles (CHLA). The research use of data was approved by the institutional review board of the Children's Health, Orange County (CHOC) hospital or Children's Hospital Los Angeles (CHLA). Table.I includes demographic information of all patients participated in this study.

**TABLE I: Patients Demographics, including 3 female and 9 male subjects, ages between 5-21 year-old. CP: Cerebral Palsy, GA1: Glutaric aciduria type 1 [30], KMT2B: Lysine Methyltransferase-2B [31]; VA: ventral anterior; VoaVop: ventral oralis anterior-posterior; VIM: ventral intermedia; VPL: ventral posterolateral; STN: subthalamic nucleus; GPi: globus pallidus internus; PPN: pedunculo-pontine nucleus.**

| Subject | Etiology        | Implanted Regions                   |
|---------|-----------------|-------------------------------------|
| S1      | CP              | VA, VoaVop, VIM, GPi                |
| S2      | Unknown (dx CP) | VA, VoaVop, VIM, GPi                |
| S3      | CP              | VoaVop, VIM, VPL, STN, GPi          |
| S4      | CP              | VA, VoaVop, VIM, GPi                |
| S5      | H-ABC (genetic) | VoaVop, VIM, STN, GPi               |
| S6      | Dyskinetic CP   | VA, VoaVop, VIM, STN, GPi           |
| S7      | GA1             | VA, VoaVop, VIM, STN, GPi           |
| S8      | KMT2B           | VA, VoaVop, VIM, PPN, STN, GPi      |
| S9      | GA1             | VA, VoaVop, VIM, PPN, STN, GPi      |
| S10     | CP              | VA, VoaVop, VIM, PPN, STN, SNr, GPi |
| S11     | MYH2            | VoaVop, VIM, PPN, STN, SNr, GPi     |
| S12     | Dyskinetic CP   | VoaVop, VIM, PPN, STN, SNr, GPi     |

### ***B. Surgical Procedure and Depth Recording***

For each patient, up to 12 temporary AdTech MM16C depth sEEG leads (AdTech Medical Instrument Corp., Oak Creek, WI, United States) were implanted under general anesthesia in potential DBS targets depending on diagnosis and clinical symptoms using standard stereotactic procedure [28], [29]. Potential stimulation targets were identified based on previous studies of clinical efficacy. These targets include subthalamic nucleus (STN), globus pallidus internus (GPi), in basal ganglia, ventral intermediate nucleus (VIM), ventral oralis anterior/posterior (VoaVop), and ventral anterior nucleus (VA), and ventral posterolateral nucleus (VPL), in thalamus, pedunculo-pontine nucleus (PPN) and Substantia Nigra reticulata (SNr) in the brainstem [32], [33].

The implanted sEEG leads contain ten high-impedance (70–90 k $\Omega$ ) micro-wire electrodes (50- $\mu$ m diameter) that are arranged in groups of two or three, spaced evenly around the circumference of the lead shaft in four rows. The leads were connected to Adtech Cabrio™ connectors that include a custom unity-gain preamplifier for each micro-contact to reduce noise and motion artifacts. All data used in this study were recorded through the high impedance contacts, with stimulation off, and sampled at 24 kHz by a custom recording system consisting of a PZ5M 256-channel digitizer, RZ2 processor, and RS4 high speed data storage (TDT, Tucker-Davis Technologies Inc., Alachua, FL, United States).

### C. Structural Connectivity

1) *Structural image acquisition and processing*: Preoperative MRI T1-weighted (structural MRI), DTI, and postoperative CT scans were obtained. Subsequently, the following steps were taken: 1) Pre-processing to correct distortions and motion artifacts of the DTI scans based on TOPUP and Eddy Current Correction algorithms [34]; 2) Co-registration of the DTI and postoperative CT images to the T1 anatomic volume; 3) Segmentation of all the subregions of the thalamus and pallidum; 4) Localization of sEEG leads using the attenuation in CT images; and 5) Estimation of micro-contacts' coordinates based on a linear model of the sEEG lead and assigning 3 mm diameter to the effective area [35].

2) *Fiber tracking and DTI parameter estimation*: In our study, DTI was employed to explore fiber orientations and measure diffusion properties. Micro-contact regions within each nucleus served as both origin and target regions for fiber tracking, enabling visualization of the anatomic pathways connecting the origin and the target. Using the diffusion tensor we computed several metrics to further characterize the fiber tracts linking these regions: 1) AD, calculated as the first eigenvalue ( $\lambda_1$ ) of the diffusion tensor, reflects water molecule diffusion along the principal axis of fiber tracts, indicating axonal integrity. Changes in AD can indicate axonal degeneration or demyelination [36]. 2) FA, a measure derived from the variance of eigenvalues ( $\lambda_1, \lambda_2, \lambda_3$ ), quantifies the degree of anisotropy in water diffusion, offering insights into the coherence and density of fiber tracts. The calculation of FA is given by Equation 1, which is scaled between 0 (isotropic diffusion) and 1 (highly anisotropic diffusion). This provides direct insight into the structural integrity of axonal fibers [37]. 3) Number of fiber tracts per unit area (N) estimates the count of individual fiber bundles connecting two regions of interest and offers information about the density of fibers within that area [38]. 4) Fiber tract length indicates the total length of individual fiber tracts connecting two regions of interest and provides insights into the spatial extent or reach of neural pathways [39].

$$FA = \sqrt{\frac{1}{2}} \cdot \sqrt{\frac{(\lambda_1 - \lambda_2)^2 + (\lambda_2 - \lambda_3)^2 + (\lambda_3 - \lambda_1)^2}{\lambda_1^2 + \lambda_2^2 + \lambda_3^2}} \quad (1)$$

### D. Functional Connectivity

1) *Electrophysiological data processing*: The LFP recordings from 10 micro-contacts of each lead were notch filtered at 60 Hz and its 5 harmonics. They were then high pass filtered at 1 Hz to remove the drift. Each adjacent pair of micro-contacts recordings were subtracted from each other to capture their voltage

difference (bipolar montage), which essentially removes the common noise and reveals the underlying neural activity.

2) *Transfer Function Computation*: The empirical transfer function of a system is computed as the ratio of the system's output Fourier transform (FFT(Y)) to the system's input Fourier transform (FFT(X)) which can be estimated as:

$$H(\omega) = \frac{FFT(Y)}{FFT(X)} \approx \frac{CPSD(X, Y)}{PSD(X) + \epsilon} \quad (2)$$

Where PSD(X) is the power spectral density of the input, CPSD(X,Y) is the cross power spectral density between input signal and output signal, with complex numbers, and  $\epsilon$  is a regularization constant. We computed the single input-single output (SISO) transfer function model between each two bipolar recording channels. After constructing the SISO transfer function models for each pair of channels, we want to investigate whether properties of magnitude of these transfer functions correlate with the anatomical features derived from DTI data. In other words, we want to evaluate how the characteristics of these transfer functions, representing functional connectivity, are related to the anatomical connectivity in the brain and to confirm whether they contain useful information about the anatomical features of the neural fibers. Note that the computed transfer functions are complex functions, which includes information about the phase and magnitude. Here, we only use the magnitude of these transfer function, and not the phase shifts and delays [27].

We computed two parameters representing the characteristics of intrinsic signal transmission from transfer function models as depicted in Figure 1. First parameter is the peak gain or the maximum transfer function gain ( $P_1$  in Figure 1), which represents the maximum level of amplification of the transmitted input signal. In other words, it is a metric that quantifies how much input signals can be amplified and spread in the network at the maximum gain frequency. The larger the gain, the more propagation and amplification of neural activity throughout the network at that frequency. The second parameter is the peak-to-floor (PF) ratio which represents the large system responses and its fast magnitude drop-off [26]. PF ratio is calculated as the ratio between peak of the frequency response and its magnitude at the roll-off frequency ( $P_2$  in Figure.1). The roll-off frequency is the boundary where the energy flowing through a system begins to drop, defined as the frequency at which the dB magnitude is 3dB below the gain at frequency  $\omega = 0$  (DC gain) or where the power drops to half the power at  $\omega = 0$ , as  $P_2$  in Fig.1. For a given pathway, we calculated the frequency response magnitude of all the SISO transfer functions as

quantified by the magnitude of  $H(\omega)$ . Thereafter, we computed the PF ratio as:

$$PF \text{ ratio} = \log_{10} \frac{|H(\omega_p)|}{|H(\omega_f)|} \quad (3)$$

where  $\omega_p$  represents the frequency at which maximum gain ( $H(\omega_p)$ ) is achieved and  $\omega_f$  is roll-off frequency and  $H(\omega_f)$  is the transfer function gain at the roll-off frequency. All these measure were computed for each pair of electrodes, per hemisphere.

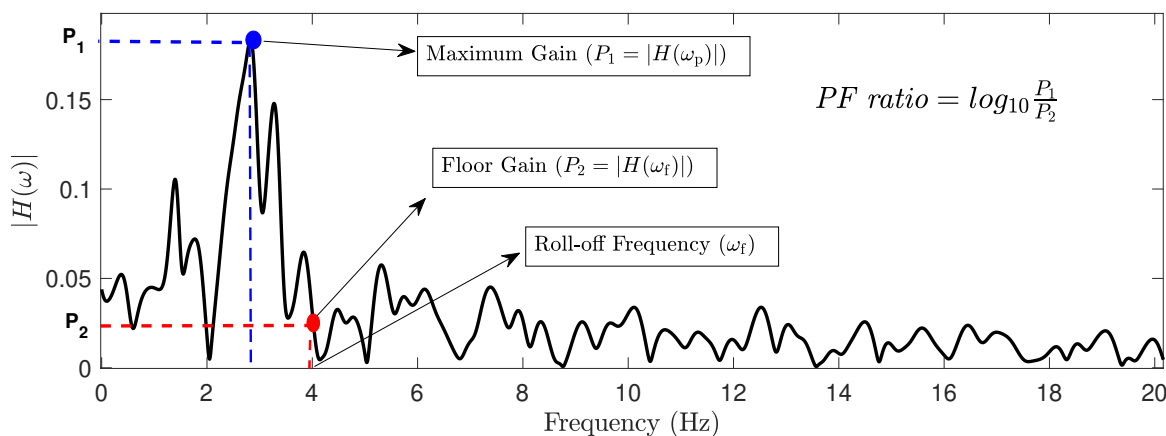

Fig. 1: This figure illustrates the magnitude plot of a sample transfer function, showcasing key parameters including maximum gain, floor gain, and roll-off frequency. The PF ratio is determined by calculating the ratio between  $P_1$  and  $P_2$ .

### III. RESULTS

In order to evaluate the relationship between the DTI and transfer function measures, first, all the variables were standardized. For each patient, we removed the outliers and kept the samples within 3 standard deviation from the mean. We removed the samples for which the max gain occurs below 2Hz as the data could be distorted in vicinity of 1 Hz cutoff frequency. We employed a GLM from the Gaussian family to model the PF ratio and the maximum gain in relation to FA, AD, N, and L for group analysis. Each predictor variable was chosen based on theoretical considerations and previous empirical findings suggesting their relevance to the functional connectivity. In addition, GLM allowed us to accommodate the normal distribution of our response variables, providing a robust framework for examining and assessing the strength and significance of the linear relationships between our predictors (FA, AD, N, and L) and our outcomes of interest (maximum gain and PF ratio). Our analysis aimed to elucidate the complex relationship between these variables with the PF ratio and maximum gain. Figure 2 shows a visualization

of three distinct pathways from the GPi to VoaVop in a single patient, exemplifying such relationship. The significance of the estimated coefficients were then tested by Wald statistic and the p-values were computed from the test statistic based on chi-squared distribution with threshold of 0.05. We adjusted all the p-values using Bonferroni method after. In addition, the Variance Inflation Factors (VIF) were calculated to ensure that collinearity is negligible in the models, affirming the robustness and reliability of our statistical results. All the statistical analysis were done in R-studio.

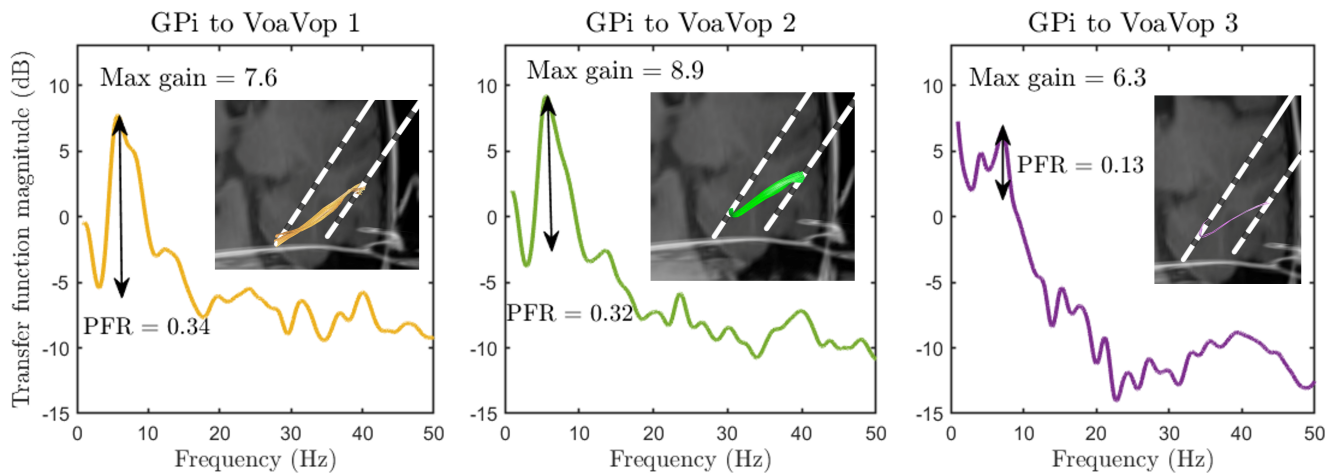

Fig. 2: This figure illustrates a sample of three unique neural pathways from GPi to VoaVop for one patient, each characterized by varying fiber sizes and integrity levels. Accompanying each pathway is its respective transfer function magnitude plot. Maximum gain and the PF ratio are annotated on each plot for clarity. The larger fibers represented in the left ( $FA = 0.40$ ,  $AD = 1.35$ ,  $L = 16.5$ ,  $total\ N = 3$ ) and middle ( $FA = 0.42$ ,  $AD = 1.38$ ,  $L = 18.8$ ,  $total\ N = 132$ ) plots exhibit higher maximum gain and PF ratio values. Conversely, the pathway depicted in the right ( $FA = 0.38$ ,  $AD = 1.2$ ,  $L = 20.07$ ,  $total\ N = 45$ ) plot, characterized by smaller FA and AD has lower maximum gain and PF ratio, underscoring the relationship between the structural characteristics and functional connectivity.

Evaluation of the relationship between the PF ratio ( $R^2 = 0.018$ ) and maximum gain ( $R^2 = 0.019$ ) with FA, AD, N, and L indicated a significant positive correlation between both the PF ratio and maximum gain with FA and AD, as illustrated in Fig. 3 and Fig. 4. Conversely, the analysis showed no statistically significant correlation between PF ratio and maximum gain with either fiber length (L) or the number of fibers per unit area (N) (Figures 3 and 4). The results of this GLM analysis are presented in Table II, where we detail the estimated effects, confidence intervals, and statistical significance of each predictor.

#### IV. DISCUSSION

Several research studies to date focused on integrating structural and functional connectivity in order to understand how they correlate and the mutual information they share with one another [40]–[47]. These investigations predominantly depend on modalities such as electro-encephalography (EEG) and fMRI



TABLE II: Statistical outcomes from the Generalized Linear Model (GLM) fitting for PF ratio and maximum gain in relation to FA, AD, N, and L.

| DTI measures | Intercept [CI]                 | FA [CI]                     | AD [CI]                      | N [CI]                 | L [CI]                 | $R^2$ |
|--------------|--------------------------------|-----------------------------|------------------------------|------------------------|------------------------|-------|
| PF ratio     | <b>-0.07</b><br>[-0.12, -0.03] | <b>0.07</b><br>[0.02, 0.13] | <b>0.11</b><br>[0.04, 0.17]  | -0.07<br>[-0.14, 0]    | -0.06<br>[-0.12, 0.01] | .018  |
| Maximum gain | <b>-0.07</b><br>[-0.12, -0.02] | <b>0.11</b><br>[0.05, 0.16] | <b>0.08</b><br>[0.02, 0.15 ] | -0.03<br>[-0.10, 0.05] | -0.02<br>[-0.09, 0.04] | .019  |

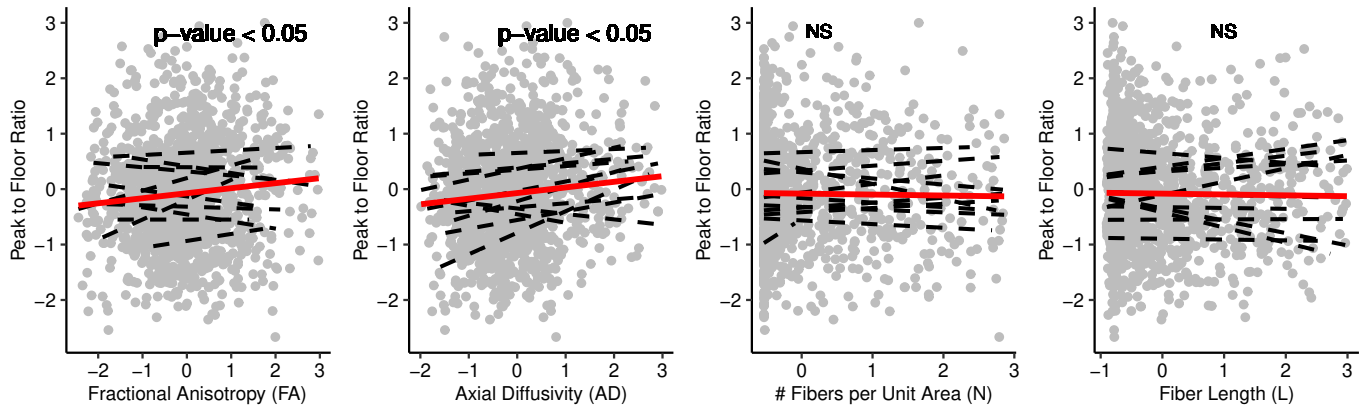

Fig. 3: Illustration of the GLM fits and the statistical significance between the PF ratio and DTI measures. Individual subject PF ratios are depicted by dashed black lines and the solid red lines represent the GLM fit for group analysis. The figure highlights the significant correlation ( $p - value < 0.01$ ) of PF ratio with Functional Anisotropy (FA) and Axial Diffusivity (AD) and the absence of significant correlation (NS) between PF ratio with number of tracts per unit area (N) and fiber length (L).

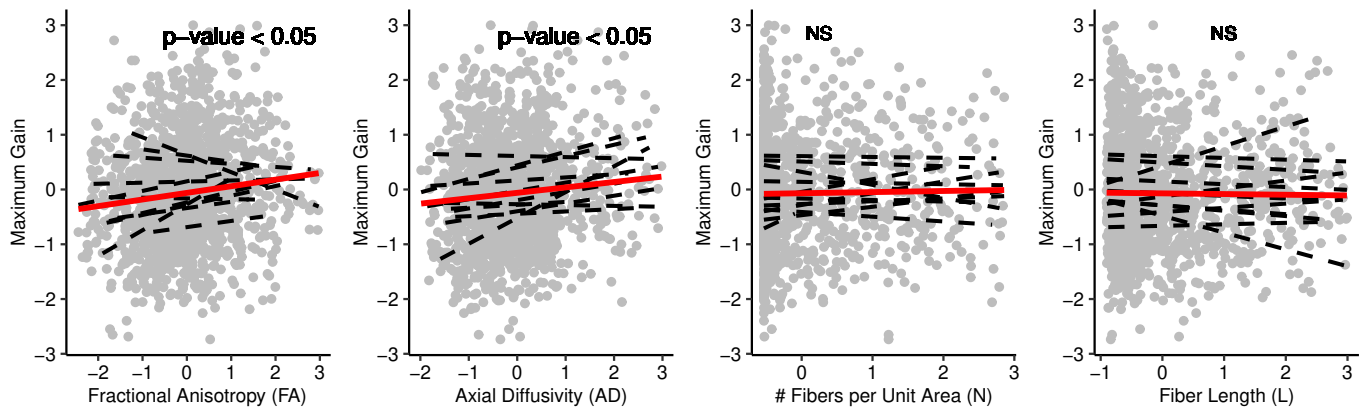

Fig. 4: Illustration of the GLM fits and the statistical significance between the maximum gains and DTI measures. Individual subject maximum gains are depicted by dashed black lines and the solid red lines represent the GLM fit for group analysis. The figure highlights the significant correlation ( $p - value < 0.01$ ) of maximum gain with Functional Anisotropy (FA) and Axial Diffusivity (AD) and the absence of a correlation between maximum gain with number of tracts per unit area (N) and fiber length (L).

for assessing functional connectivity, while employing DTI to assess structural connectivity. However, despite significant insights offered by these studies, this relationship is still poorly understood. Notably,

limitations such as the relatively low spatial resolution of EEG and the low temporal resolution of fMRI prevents us from conducting precise localization and capturing of rapid neural dynamics while assessing functional connectivity [48], [49]. Thus, it seems necessary to employ other modalities to fully address the relationship between structural and functional connectivity in the brain.

Here in this paper, we aimed to study the relationship between DTI parameters and characteristics of patient-specific transfer function models obtained from brain intrinsic neural activity. Thus, we investigated the correlation between FA, AD, Number of fiber tracts per unit area (N), and fiber tract length (L) as DTI parameters with maximum transfer function gain and PF ratio. Our results, consistent with previous works done on the relationship between the functional and anatomical connectivity [40]–[47], provide further evidence of the relationship between anatomical and functional connectivity. In particular, our results highlight positive correlation between FA and AD with both characteristic of transfer function models (i.e., PF ratio and maximum gain). Significant positive correlation between FA and maximum transfer function gain shows that axonal fibers with higher integrity can better amplify and spread an intrinsic brain signal throughout the brain network. FA significant positive correlation with PF ratio suggests that axonal fibers with higher integrity have the capacity to provide larger system response and signal transmission. Significant positive correlation of maximum transfer function gain and PF ratio with AD suggests that the maximum level of signal amplification and fast magnitude drop-offs happen with higher magnitudes of diffusion parallel to fiber tracts.

In addition, Abe et al. previously provided evidence on the correlation between DTI parameters (i.e., FA, tract length, and tract diameter) and characteristics of DBS evoked potentials (EPs) [35]. Their results suggest that the integrity of white matter tracts plays a crucial role in determining the efficiency, strength, and transmission speed of DBS-induced signals. Moreover, Kasiri et al. [27] demonstrated through a patient-specific transfer function approach that DBS pulses travel along normal pathways from the stimulation site to distant targets in the brain. These studies collectively highlight the varied role of DTI parameters, such as FA and AD, not only in providing insights into anatomical connectivity, but also in explaining information about neural signal transmission in the brain.

## V. LIMITATION

It is crucial to acknowledge the limitations associated with Linear Time-Invariant (LTI) models, including transfer function analysis, which we employed to model the signal transmission between different nuclei in the deep brain regions. LTI models may not fully and accurately capture the dynamic and

nonlinear nature of brain function. The brain's complex and adaptive nature might involve time-varying dynamics that cannot be adequately addressed by LTI models.

Moreover, the transfer function gains here do not indicate that the information is transmitted through a direct pathway from input to the output of the pathway's system. Such measure can also indicate a common input to both system's input and output (two ends of a pathway), whether there is a fiber between them or not. However, in this study, since we are investigating the correlation of anatomical connectivity with the functional connectivity, there always exists a tract between the input and output. Therefore, this concern is not valid here, although it is a valid concern in general.

## VI. CONCLUSION

In conclusion, our study into the relationship between DTI parameters and characteristics of patient-specific transfer function models provides further evidence for the existence of significant relationship between structural and functional connectivity, offering valuable insights into how white matter integrity affects intrinsic neural activity propagation in the brain network.

**Acknowledgements.** We thank our volunteers and their parents for participating in this study. We also thank Jennifer MacLean, Diana Ferman, and Teresa Serna for their assistance with neurological examinations and Jaya Nataraj for helping in data collection. This study is funded by the Cerebral Palsy Alliance Research Foundation (PG02518).

**Conflicts of Interest.** All authors declare no conflicts of interest.

**Authors Contributions** M.K., E.H.M., R.S., S.A.S.M., and T.D.S. conducted the experiments and collected the data. M.K. analyzed the neurophysiological data and performed statistical analysis. S.A. performed the image analysis and electrode localization. R.S. integrated DTI and neurophysiology data. M.K., S.A., and T.D.S. interpreted the results of the study. T.D.S. performed the neurological examination. All authors contributed to writing and revision of the final manuscript.

## REFERENCES

- [1] C. Yen, C.-L. Lin, and M.-C. Chiang, "Exploring the frontiers of neuroimaging: a review of recent advances in understanding brain functioning and disorders," *Life*, vol. 13, no. 7, p. 1472, 2023.
- [2] L. Kong, Q. He, Q. Li, R. Schreiber, K. I. Kaitin, and L. Shao, "Rapid progress in neuroimaging technologies fuels central nervous system translational medicine," *Drug Discovery Today*, p. 103485, 2023.
- [3] J. M. Henderson, "“connectomic surgery”: diffusion tensor imaging (dti) tractography as a targeting modality for surgical modulation of neural networks," *Frontiers in integrative neuroscience*, vol. 6, p. 15, 2012.

- [4] V. A. Coenen and M. Reisert, "Dti for brain targeting: Diffusion weighted imaging fiber tractography—assisted deep brain stimulation," in *International Review of Neurobiology*. Elsevier, 2021, vol. 159, pp. 47–67.
- [5] S. Owen, J. Heath, M. Kringelbach, A. Green, E. Pereira, N. Jenkinson, T. Jegan, J. Stein, and T. Aziz, "Pre-operative dti and probabilistic tractography in four patients with deep brain stimulation for chronic pain," *Journal of Clinical Neuroscience*, vol. 15, no. 7, pp. 801–805, 2008.
- [6] B. Mädler and V. Coenen, "Explaining clinical effects of deep brain stimulation through simplified target-specific modeling of the volume of activated tissue," *American Journal of Neuroradiology*, vol. 33, no. 6, pp. 1072–1080, 2012.
- [7] V. A. Coenen, N. Allert, S. Paus, M. Kronenbürger, H. Urbach, and B. Mädler, "Modulation of the cerebello-thalamo-cortical network in thalamic deep brain stimulation for tremor: a diffusion tensor imaging study," *Neurosurgery*, vol. 75, no. 6, pp. 657–670, 2014.
- [8] K. N. AAQ, "Improving surgical outcome using diffusion tensor imaging techniques in deep brain stimulation. front surg. 2017; 4: 1–11," 2017.
- [9] S. Owen, J. Heath, M. Kringelbach, J. Stein, and T. Aziz, "Preoperative dti and probabilistic tractography in an amputee with deep brain stimulation for lower limb stump pain," *British journal of neurosurgery*, vol. 21, no. 5, pp. 485–490, 2007.
- [10] V. A. Coenen, B. Mädler, H. Schiffbauer, H. Urbach, and N. Allert, "Individual fiber anatomy of the subthalamic region revealed with diffusion tensor imaging: a concept to identify the deep brain stimulation target for tremor suppression," *Neurosurgery*, vol. 68, no. 4, pp. 1069–1076, 2011.
- [11] J. M. Anthofer, K. Steib, C. Fellner, M. Lange, A. Brawanski, and J. Schlaier, "Dti-based deterministic fibre tracking of the medial forebrain bundle," *Acta neurochirurgica*, vol. 157, pp. 469–477, 2015.
- [12] V. A. Coenen, B. Varkuti, Y. Parpaley, S. Skodda, T. Prokop, H. Urbach, M. Li, and P. C. Reinacher, "Postoperative neuroimaging analysis of drt deep brain stimulation revision surgery for complicated essential tremor," *Acta Neurochirurgica*, vol. 159, pp. 779–787, 2017.
- [13] V. A. Coenen, N. Allert, and B. Mädler, "A role of diffusion tensor imaging fiber tracking in deep brain stimulation surgery: Dbs of the dentato-rubro-thalamic tract (drt) for the treatment of therapy-refractory tremor," *Acta neurochirurgica*, vol. 153, pp. 1579–1585, 2011.
- [14] V. Coenen, C. Jenkner, C. Honey, and B. Mädler, "Electrophysiologic validation of diffusion tensor imaging tractography during deep brain stimulation surgery," *American Journal of Neuroradiology*, vol. 37, no. 8, pp. 1470–1478, 2016.
- [15] J. Schlaier, J. Anthofer, K. Steib, C. Fellner, E. Rothenfusser, A. Brawanski, and M. Lange, "Deep brain stimulation for essential tremor: targeting the dentato-rubro-thalamic tract?" *Neuromodulation: Technology at the Neural Interface*, vol. 18, no. 2, pp. 105–112, 2015.
- [16] J. Anthofer, K. Steib, C. Fellner, M. Lange, A. Brawanski, and J. Schlaier, "The variability of atlas-based targets in relation to surrounding major fibre tracts in thalamic deep brain stimulation," *Acta neurochirurgica*, vol. 156, pp. 1497–1504, 2014.
- [17] K. D. Bhatia, L. Henderson, G. Ramsey-Stewart, and J. May, "Diffusion tensor imaging to aid subgenual cingulum target selection for deep brain stimulation in depression," *Stereotactic and functional neurosurgery*, vol. 90, no. 4, pp. 225–232, 2012.
- [18] C. R. Butson, S. E. Cooper, J. M. Henderson, and C. C. McIntyre, "Predicting the effects of deep brain stimulation with diffusion tensor based electric field models," in *Medical Image Computing and Computer-Assisted Intervention–MICCAI 2006: 9th International Conference, Copenhagen, Denmark, October 1-6, 2006. Proceedings, Part II 9*. Springer, 2006, pp. 429–437.
- [19] E. W. Lang, A. M. Tomé, I. R. Keck, J. Górriz-Sáez, and C. G. Puntonet, "Brain connectivity analysis: a short survey," *Computational intelligence and neuroscience*, vol. 2012, pp. 8–8, 2012.
- [20] J. B. Rowe, "Connectivity analysis is essential to understand neurological disorders," *Frontiers in Systems Neuroscience*, vol. 4, p. 144, 2010.

- [21] P. M. Rossini, R. Di Iorio, M. Bentivoglio, G. Bertini, F. Ferreri, C. Gerloff, R. J. Ilmoniemi, F. Miraglia, M. A. Nitsche, F. Pestilli *et al.*, “Methods for analysis of brain connectivity: An ifcn-sponsored review,” *Clinical Neurophysiology*, vol. 130, no. 10, pp. 1833–1858, 2019.
- [22] S. J. Carr, A. Gershon, N. Shafiabadi, S. D. Lhatoo, C. Tatsuoka, and S. S. Sahoo, “An integrative approach to study structural and functional network connectivity in epilepsy using imaging and signal data,” *Frontiers in integrative neuroscience*, vol. 14, p. 491403, 2021.
- [23] J. Goñi, M. P. Van Den Heuvel, A. Avena-Koenigsberger, N. Velez de Mendizabal, R. F. Betzel, A. Griffa, P. Hagmann, B. Corominas-Murtra, J.-P. Thiran, and O. Sporns, “Resting-brain functional connectivity predicted by analytic measures of network communication,” *Proceedings of the National Academy of Sciences*, vol. 111, no. 2, pp. 833–838, 2014.
- [24] M. D. Greicius, K. Supekar, V. Menon, and R. F. Dougherty, “Resting-state functional connectivity reflects structural connectivity in the default mode network,” *Cerebral cortex*, vol. 19, no. 1, pp. 72–78, 2009.
- [25] M. J. Rosa, J. Kilner, F. Blankenburg, O. Josephs, and W. Penny, “Estimating the transfer function from neuronal activity to bold using simultaneous eeg-fmri,” *Neuroimage*, vol. 49, no. 2, pp. 1496–1509, 2010.
- [26] G. Kamali, R. J. Smith, M. Hays, C. Coogan, N. E. Crone, J. Y. Kang, and S. V. Sarma, “Transfer function models for the localization of seizure onset zone from cortico-cortical evoked potentials,” *Frontiers in Neurology*, vol. 11, p. 579961, 2020.
- [27] M. Kasiri, J. W. Hillman, E. Hernandez-Martin, S. A. S. Mousavi, and T. D. Sanger, “Endogenous signals during active movement predict deep brain stimulation evoked potential pathways: Results of a transfer function analysis,” *medRxiv*, pp. 2023–04, 2023.
- [28] M. Liker and T. Sanger, “Pediatric deep brain stimulation in secondary dystonia using stereotactic depth electrode targeting,” in *MOVEMENT DISORDERS*, vol. 34. WILEY 111 RIVER ST, HOBOKEN 07030-5774, NJ USA, 2019, pp. S534–S535.
- [29] M. A. Liker, T. D. Sanger, J. A. MacLean, J. Nataraj, E. Arguelles, M. Krieger, A. Robison, and J. Olaya, “Stereotactic awake basal ganglia electrophysiological recording and stimulation (sabers): A novel staged procedure for personalized targeting of deep brain stimulation in pediatric movement and neuropsychiatric disorders,” *Journal of Child Neurology*, vol. 0, no. 0, p. 08830738231224057, 0, pMID: 38409793. [Online]. Available: <https://doi.org/10.1177/08830738231224057>
- [30] N. e. a. Boy, “Proposed recommendations for diagnosing and managing individuals with glutaric aciduria type i: second revision,” *Journal of inherited metabolic disease*, vol. 40, no. 1, pp. 75–101, 2017.
- [31] L. Abela and M. A. Kurian, “Kmt2b-related dystonia synonyms: Dyt28, dyt-kmt2b,” 1993. [Online]. Available: <https://www.ncbi.nlm.nih.gov/books/>
- [32] T. D. Sanger, “Deep brain stimulation for cerebral palsy: where are we now?” *Developmental Medicine & Child Neurology*, vol. 62, no. 1, pp. 28–33, 2020. [Online]. Available: <https://onlinelibrary.wiley.com/doi/abs/10.1111/dmcn.14295>
- [33] E. Hernandez-Martin, M. Kasiri, S. Abe, J. MacLean, J. Olaya, M. Liker, J. Chu, and T. D. Sanger, “Globus pallidus internus activity increases during voluntary movement in children with dystonia,” *iScience*, vol. 26, no. 7, p. 107066, 2023. [Online]. Available: <https://www.sciencedirect.com/science/article/pii/S2589004223011434>
- [34] P. A. Taylor, A. Alhamud, A. van der Kouwe, M. G. Saleh, B. Laughton, and E. Meintjes, “Assessing the performance of different dti motion correction strategies in the presence of epi distortion correction,” *Human brain mapping*, vol. 37, no. 12, pp. 4405–4424, Dec 2016. [Online]. Available: <https://doi.org/10.1002/hbm.23318>
- [35] S. Abe, J. S. L. Vidmark, E. Hernandez-Martin, M. Kasiri, R. Soroushmojehi, S. A. S. Mousavi, and T. D. Sanger, “Diffusion tractography predicts deep brain stimulation evoked potential amplitude and delay.” *medRxiv*, 2024. [Online]. Available: <https://www.medrxiv.org/content/early/2024/04/13/2024.04.11.24305627>
- [36] P. J. Winklewski, A. Sabisz, P. Naumczyk, K. Jodzio, E. Szurowska, and A. Szarmach, “Understanding the physiopathology

- behind axial and radial diffusivity changes—what do we know?” *Frontiers in Neurology*, vol. 9, 2018. [Online]. Available: <https://www.frontiersin.org/journals/neurology/articles/10.3389/fneur.2018.00092>
- [37] “Chapter 7 - new image contrasts from diffusion tensor imaging: Theory, meaning, and usefulness of dti-based image contrast,” in *Introduction to Diffusion Tensor Imaging (Second Edition)*, second edition ed., S. Mori and J.-D. Tournier, Eds. San Diego: Academic Press, 2014, pp. 53–64. [Online]. Available: <https://www.sciencedirect.com/science/article/pii/B9780123983985000072>
- [38] D. K. Jones, T. R. Knösche, and R. Turner, “White matter integrity, fiber count, and other fallacies: The do’s and don’ts of diffusion mri,” *NeuroImage*, vol. 73, pp. 239–254, 2013. [Online]. Available: <https://www.sciencedirect.com/science/article/pii/S1053811912007306>
- [39] S. Correia, S. Y. Lee, T. Voorn, D. F. Tate, R. H. Paul, S. Zhang, S. P. Salloway, P. F. Malloy, and D. H. Laidlaw, “Quantitative tractography metrics of white matter integrity in diffusion-tensor mri,” *NeuroImage*, vol. 42, no. 2, pp. 568–581, 2008. [Online]. Available: <https://www.sciencedirect.com/science/article/pii/S1053811908006435>
- [40] M. C. Litwińczuk, N. Muhlert, L. Cloutman, N. Trujillo-Barreto, and A. Woollams, “Combination of structural and functional connectivity explains unique variation in specific domains of cognitive function,” *NeuroImage*, vol. 262, p. 119531, 2022.
- [41] P. Babaeeghazvini, L. M. Rueda-Delgado, J. Gooijers, S. P. Swinnen, and A. Daffertshofer, “Brain structural and functional connectivity: A review of combined works of diffusion magnetic resonance imaging and electro-encephalography,” *Frontiers in Human Neuroscience*, vol. 15, p. 721206, 2021.
- [42] E. Gleichgerricht, A. S. Greenblatt, T. S. Kellermann, N. Rowland, W. A. Vandergrift, J. Edwards, K. A. Davis, and L. Bonilha, “Patterns of seizure spread in temporal lobe epilepsy are associated with distinct white matter tracts,” *Epilepsy research*, vol. 171, p. 106571, 2021.
- [43] T. L. Richards, T. J. Grabowski, P. Boord, K. Yagle, M. Askren, Z. Mestre, P. Robinson, O. Welker, D. Gulliford, W. Nagy *et al.*, “Contrasting brain patterns of writing-related dti parameters, fmri connectivity, and dti–fmri connectivity correlations in children with and without dysgraphia or dyslexia,” *NeuroImage: Clinical*, vol. 8, pp. 408–421, 2015.
- [44] H. Huang and M. Ding, “Linking functional connectivity and structural connectivity quantitatively: a comparison of methods,” *Brain connectivity*, vol. 6, no. 2, pp. 99–108, 2016.
- [45] R. Schmidt, E. Verstraete, M. A. de Reus, J. H. Veldink, L. H. van den Berg, and M. P. van den Heuvel, “Correlation between structural and functional connectivity impairment in amyotrophic lateral sclerosis,” *Human brain mapping*, vol. 35, no. 9, pp. 4386–4395, 2014.
- [46] M. A. Koch, D. G. Norris, and M. Hund-Georgiadis, “An investigation of functional and anatomical connectivity using magnetic resonance imaging,” *Neuroimage*, vol. 16, no. 1, pp. 241–250, 2002.
- [47] H. Liu, G. Fan, K. Xu, and F. Wang, “Changes in cerebellar functional connectivity and anatomical connectivity in schizophrenia: a combined resting-state functional mri and diffusion tensor imaging study,” *Journal of magnetic resonance imaging*, vol. 34, no. 6, pp. 1430–1438, 2011.
- [48] G. H. Glover, “Overview of functional magnetic resonance imaging,” *Neurosurgery Clinics*, vol. 22, no. 2, pp. 133–139, 2011.
- [49] B. Burle, L. Spieser, C. Roger, L. Casini, T. Hasbroucq, and F. Vidal, “Spatial and temporal resolutions of eeg: Is it really black and white? a scalp current density view,” *International Journal of Psychophysiology*, vol. 97, no. 3, pp. 210–220, 2015.
